# Supplementary material for: Conjugated energetic salts based on 3,3′-((1E,1′E)-(2,4,6-trinitro-1,3-phenylene)bis(ethene-2,1-diyl))bis(2,4,6-trinitrophenol)
Source: Royal Society of Chemistry journal article supplement (doi:10.1039/c4nj01091d), 2014-01-01

## Supporting Information

---

### **Conjugated Energetic Salts Based on 3,3'-((1*E*,1'*E*)-(2,4,6-trinitro-1,3-phenylene)bis(ethene-2,1-diyl))bis(2,4,6-trinitrophenol)**

Junhui Xu,<sup>[a]</sup> Jianping Wei,<sup>[a]</sup> Fangmei Li,<sup>[a]</sup> Qingguo Ma <sup>[a]</sup> and Xinhua Peng\*<sup>[a]</sup>

*School of Chemical Engineering, Nanjing University of Science and Technology, Nanjing 210094, China. E-mail: xhpeng@mail.njust.edu.cn Fax: (+) 86-025-84317639; Tel: (+) 86-025-84315520*



# Supporting Information

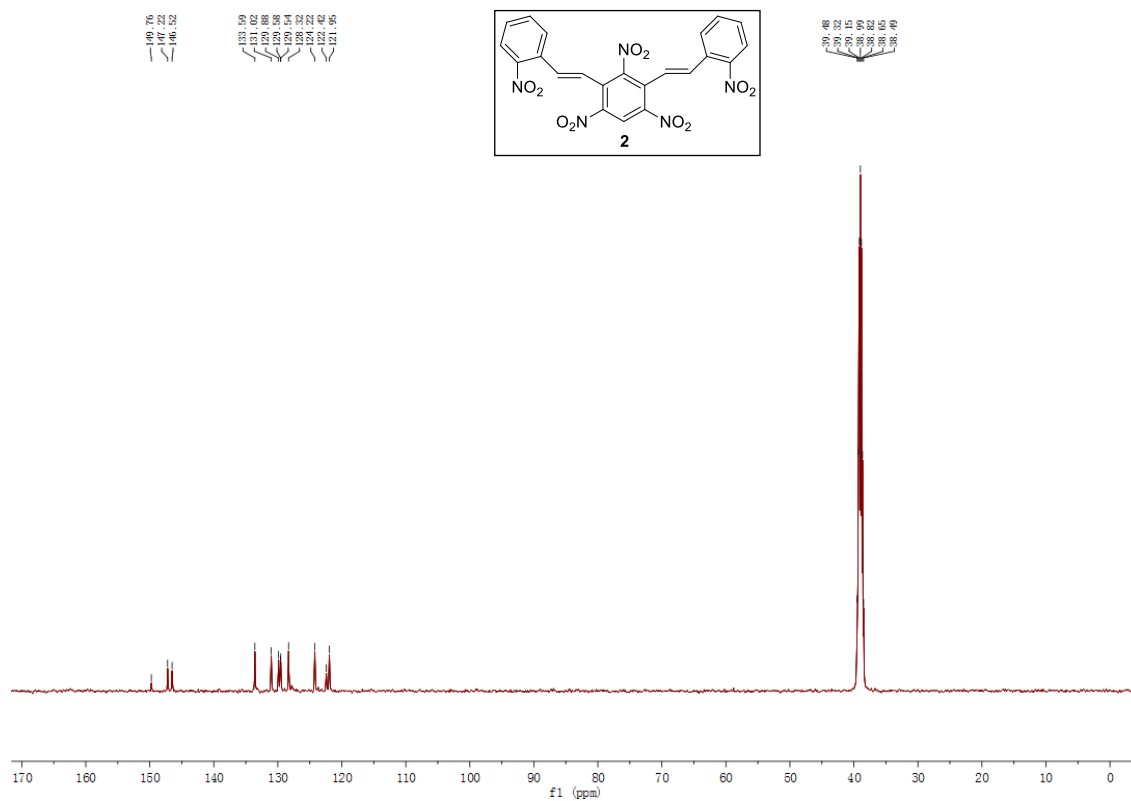

Comment 1  
Comment 2

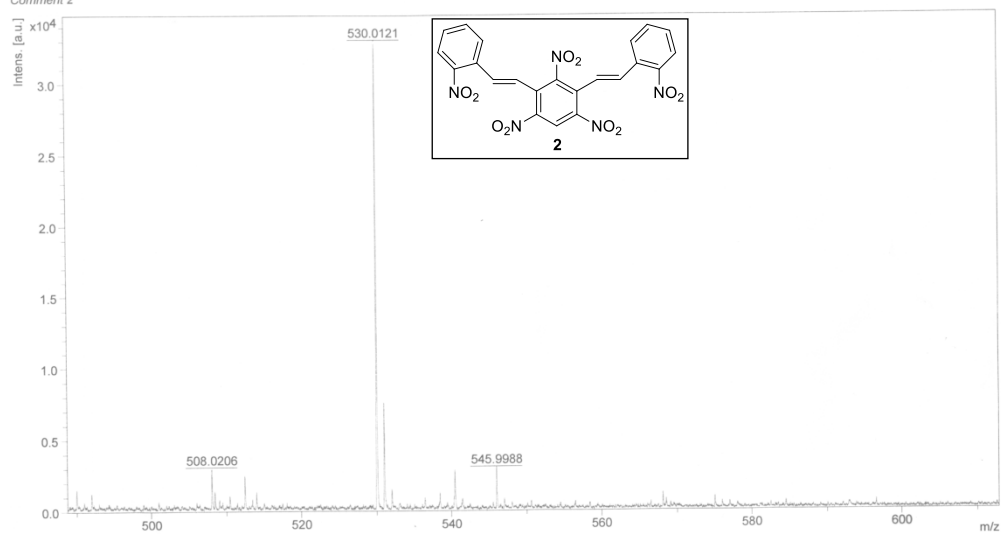

Bruker Daltonics flexAnalysis

printed: 2013/4/7 11:04:04

# Supporting Information

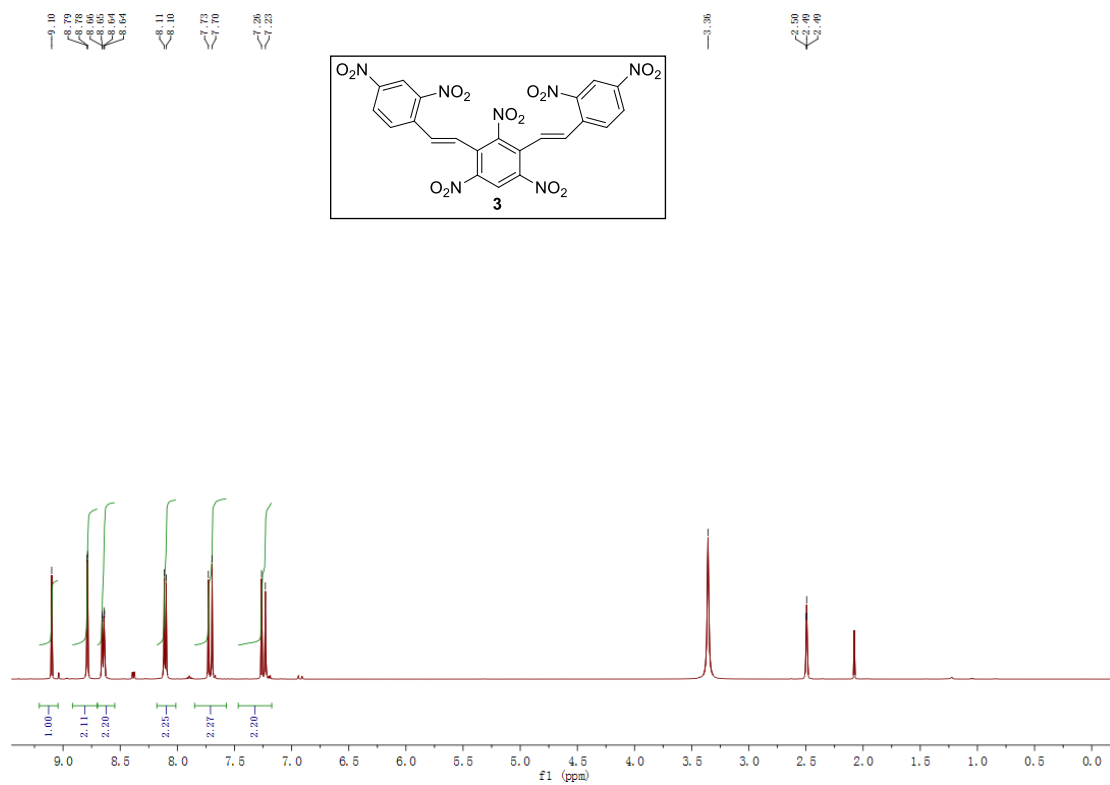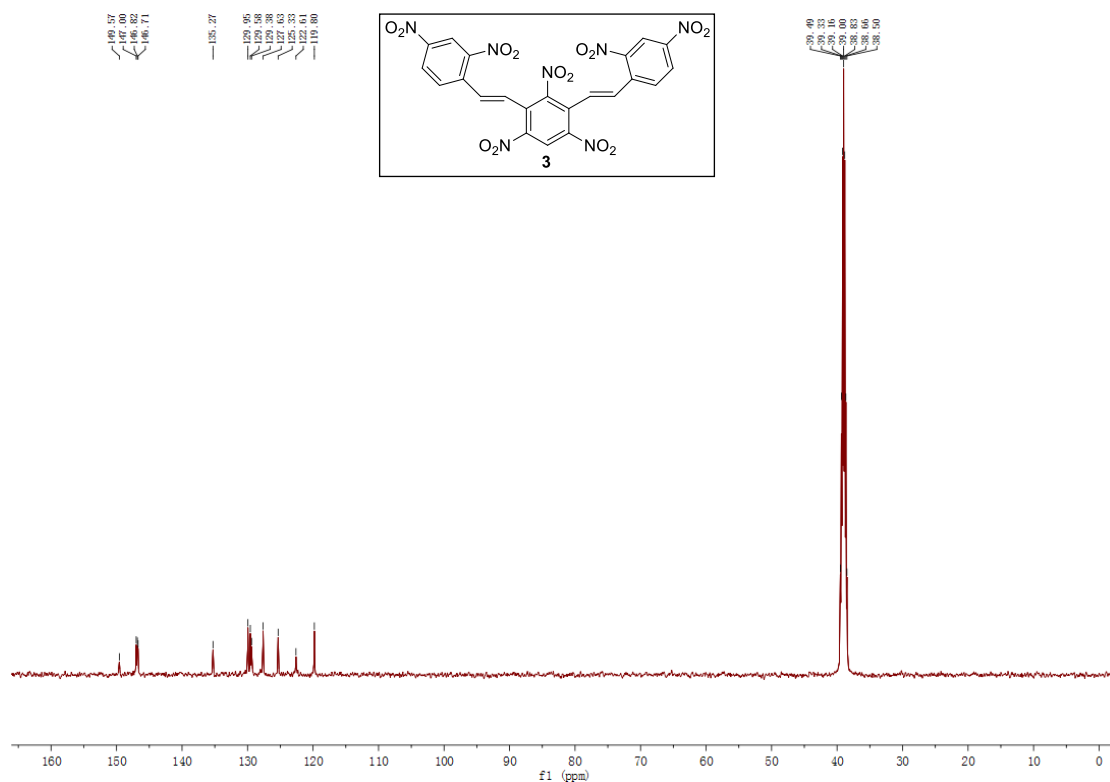

# Supporting Information

201300918\_13 26 (0.689) Cm (22:28)

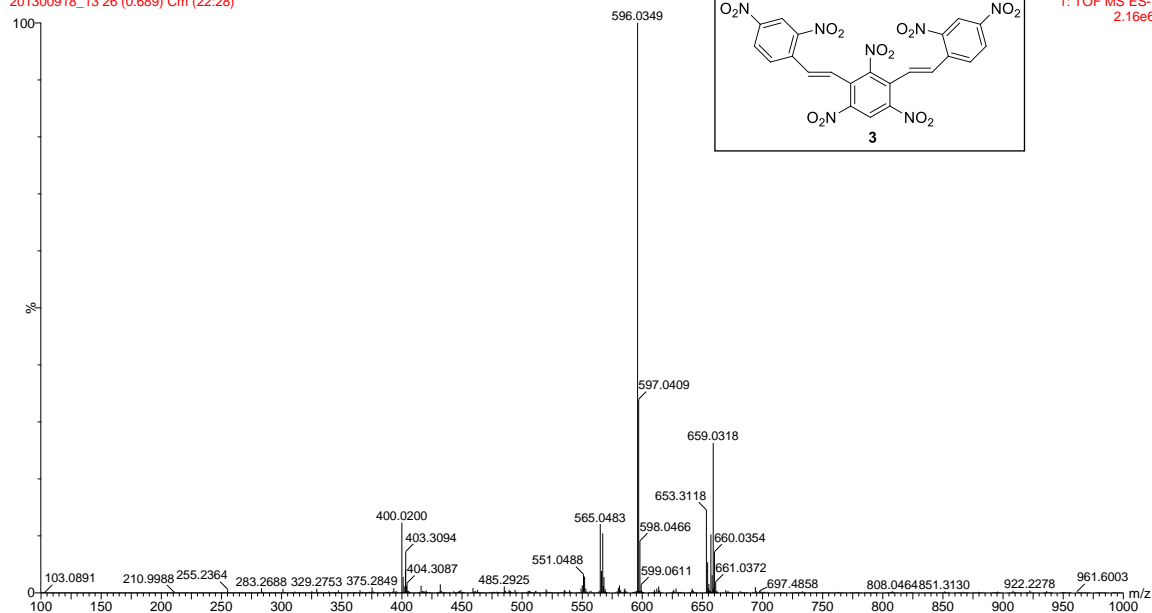

1: TOF MS ES-  
2.16e6

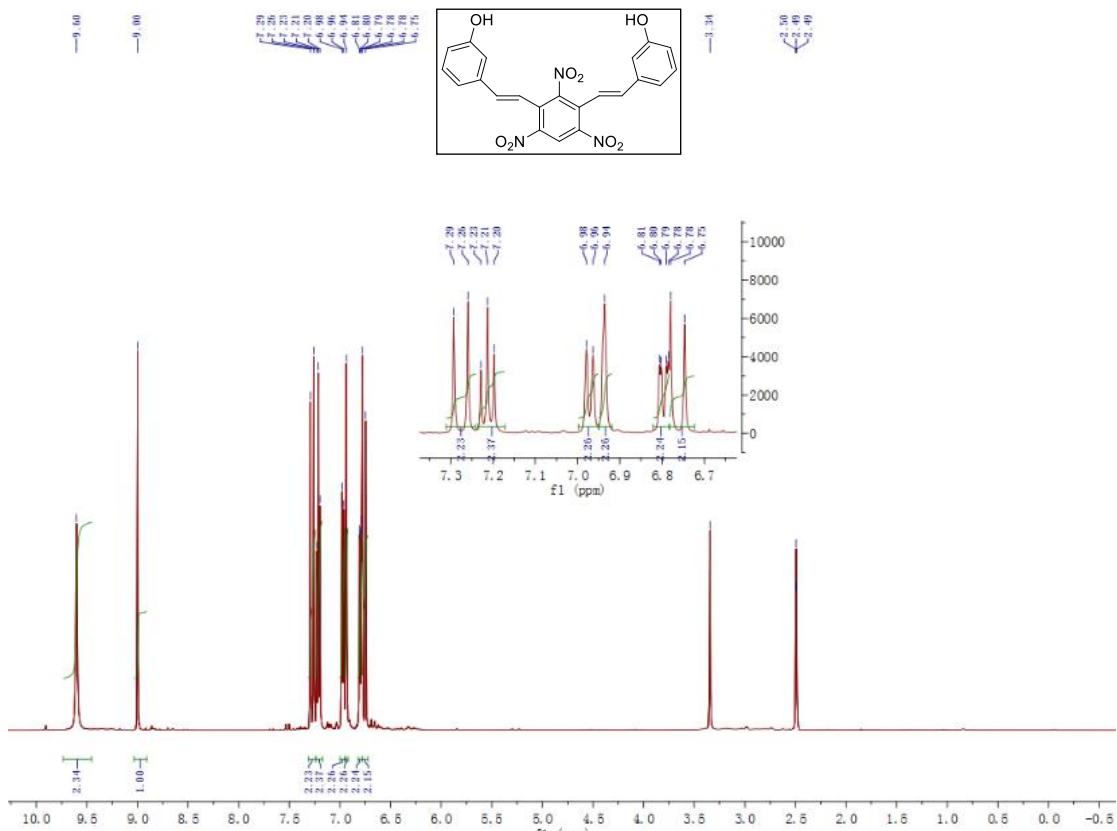

# Supporting Information

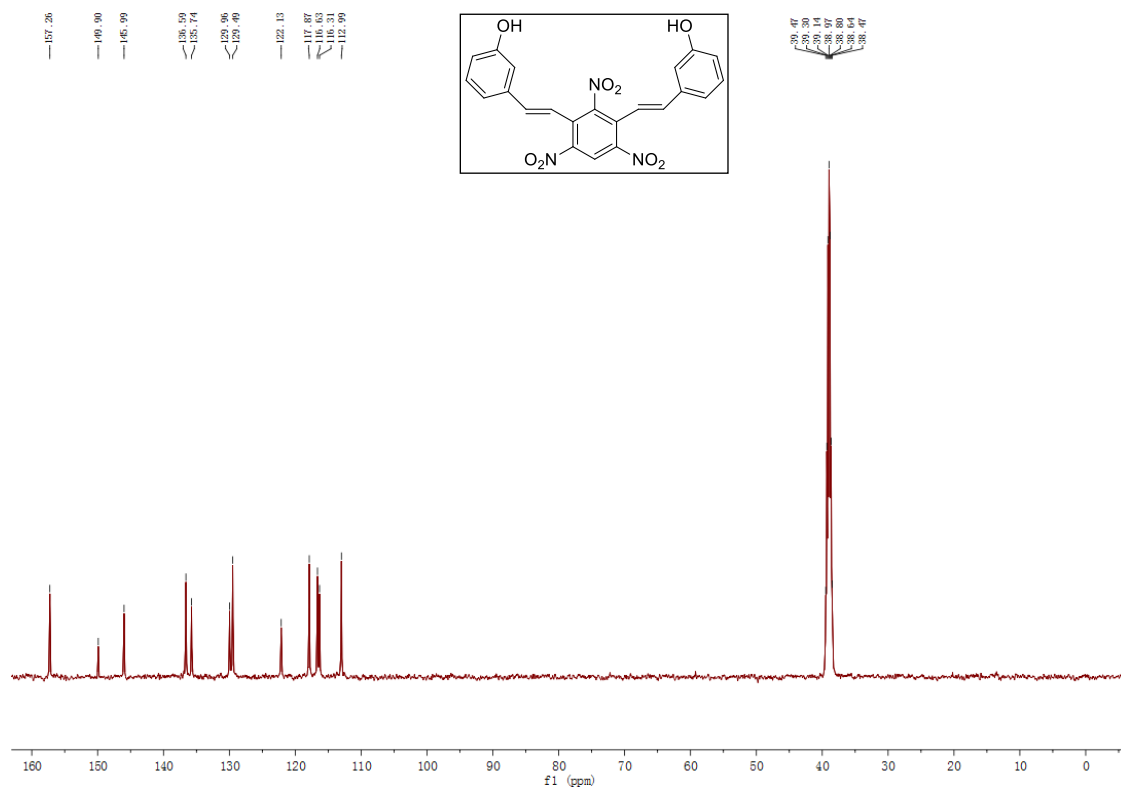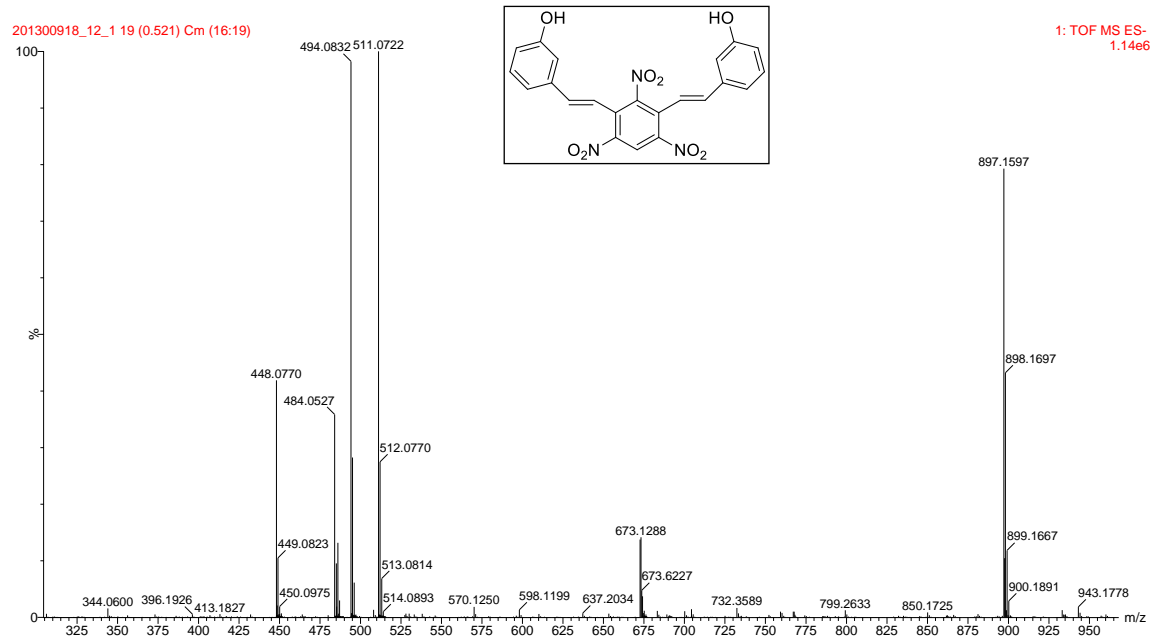



# Supporting Information

201300918\_22\_26 (0.680) Cm (26:27)

1: TOF MS ES-  
2.96e6

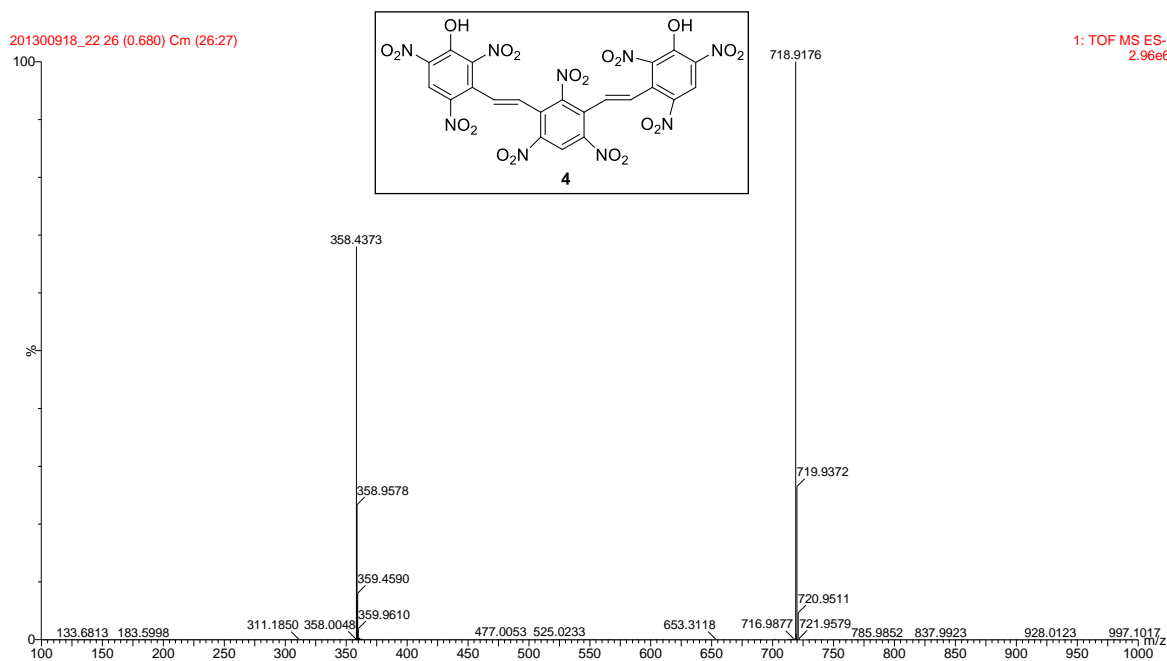



# Supporting Information

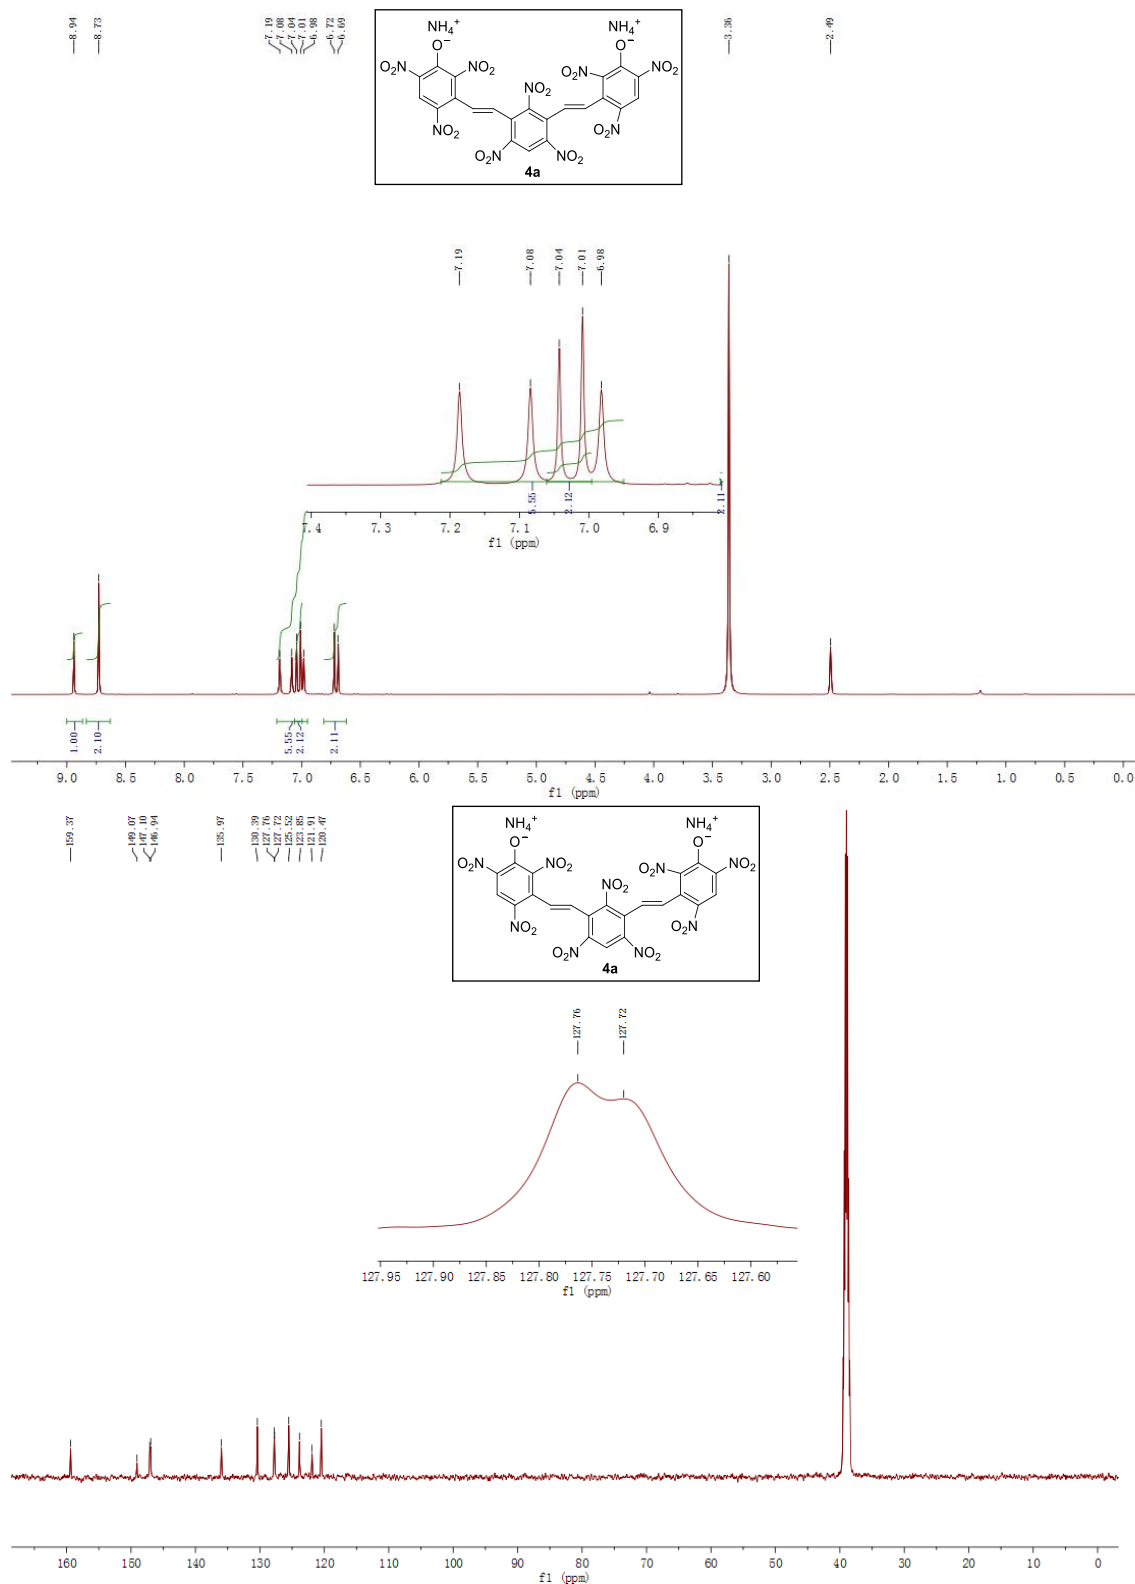

(D<sub>2</sub>O exchange result for Ammonium salt **4a**)

# Supporting Information

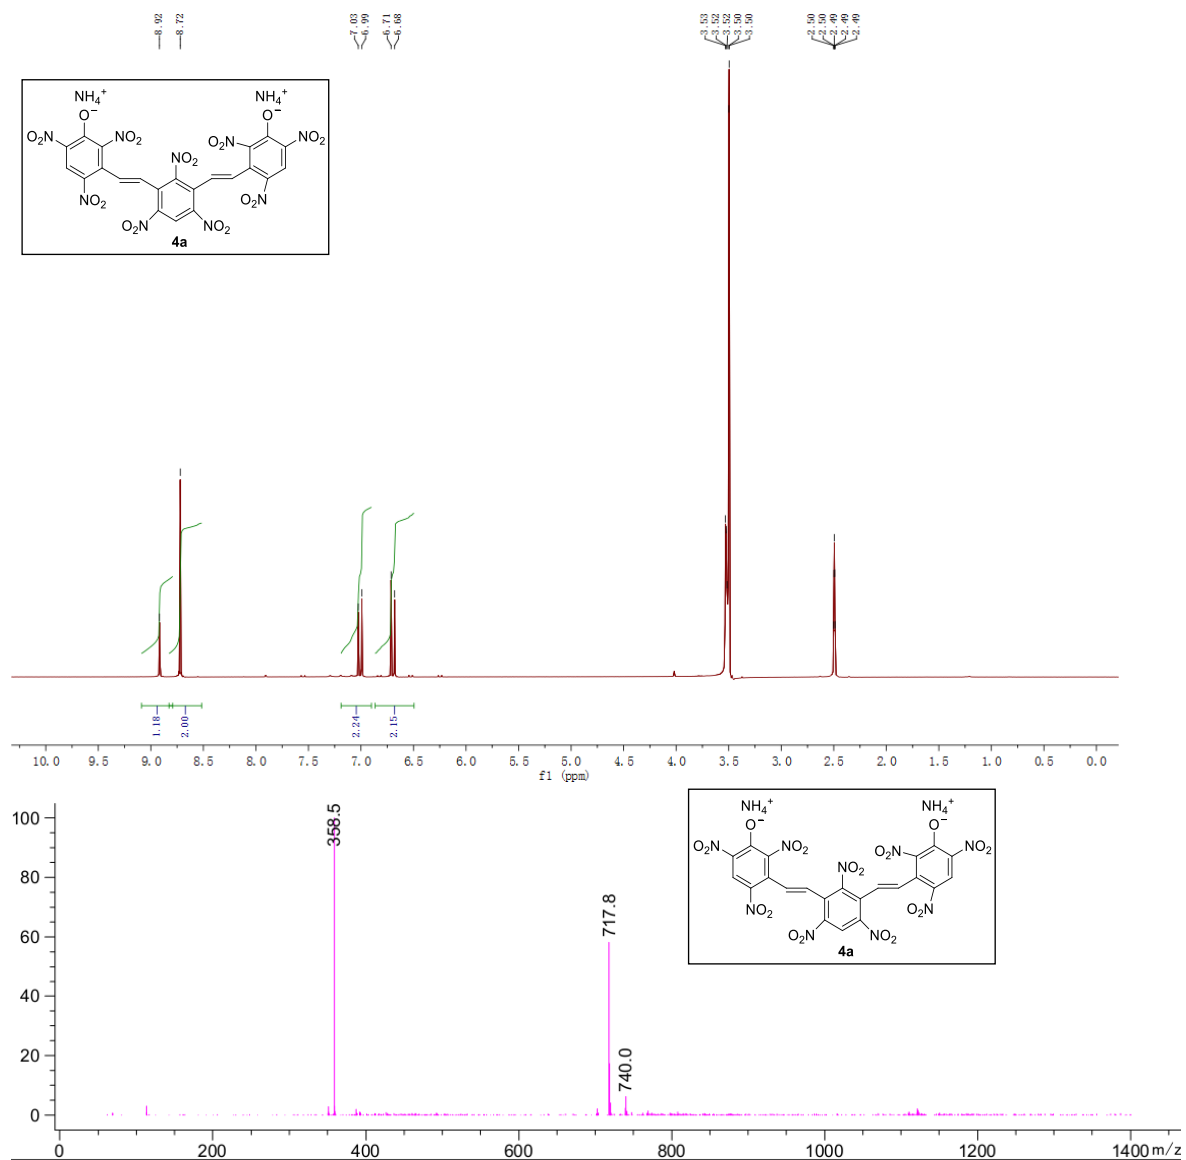



# Supporting Information

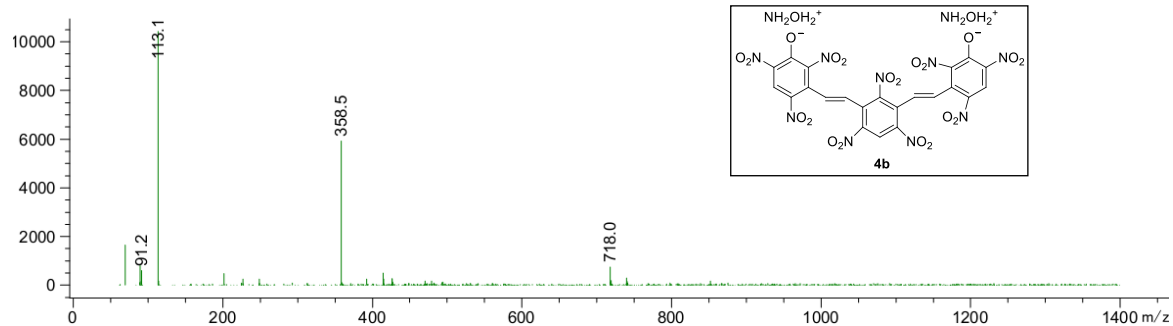

# Supporting Information

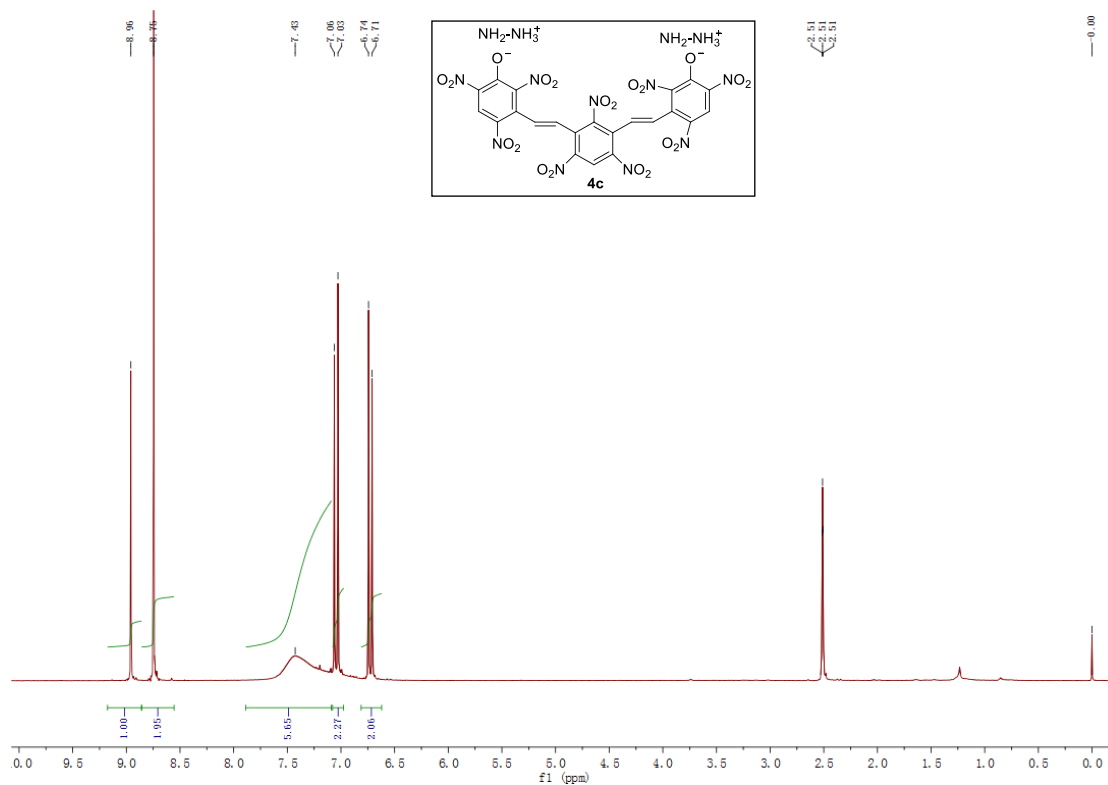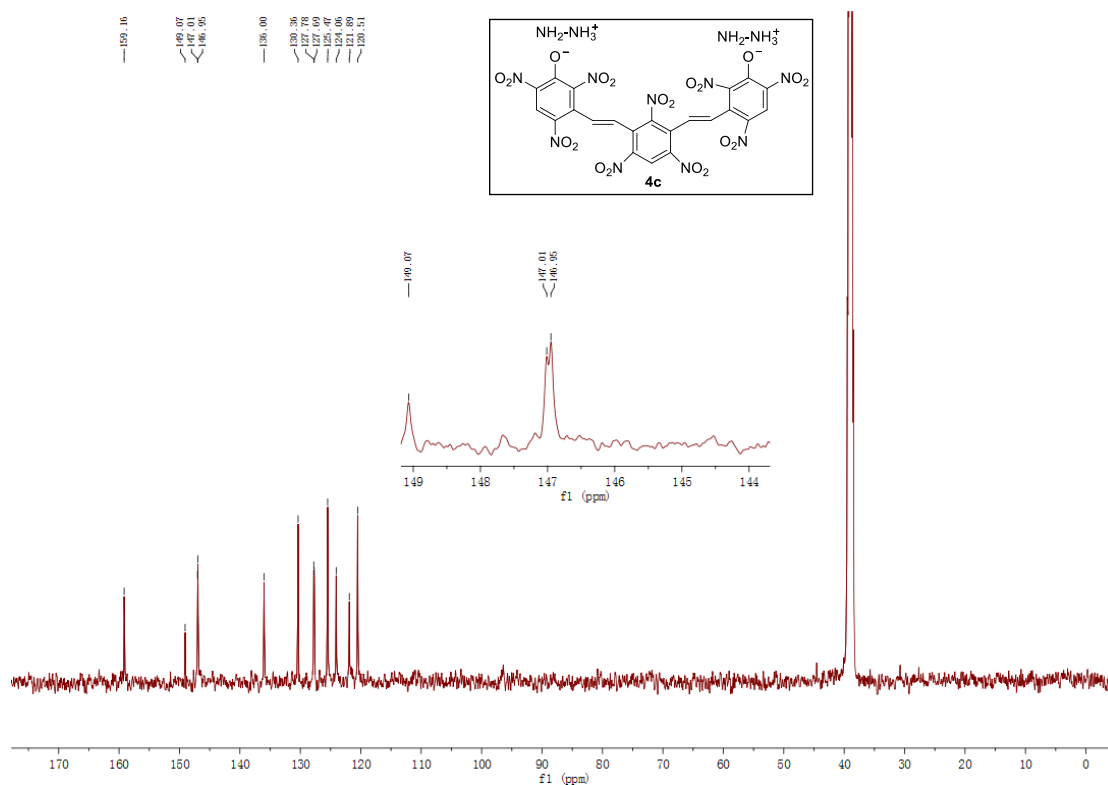

# Supporting Information

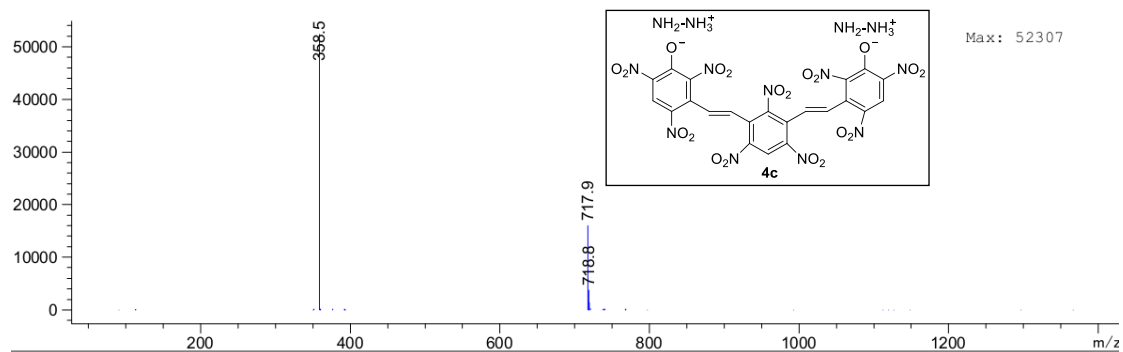

# Supporting Information

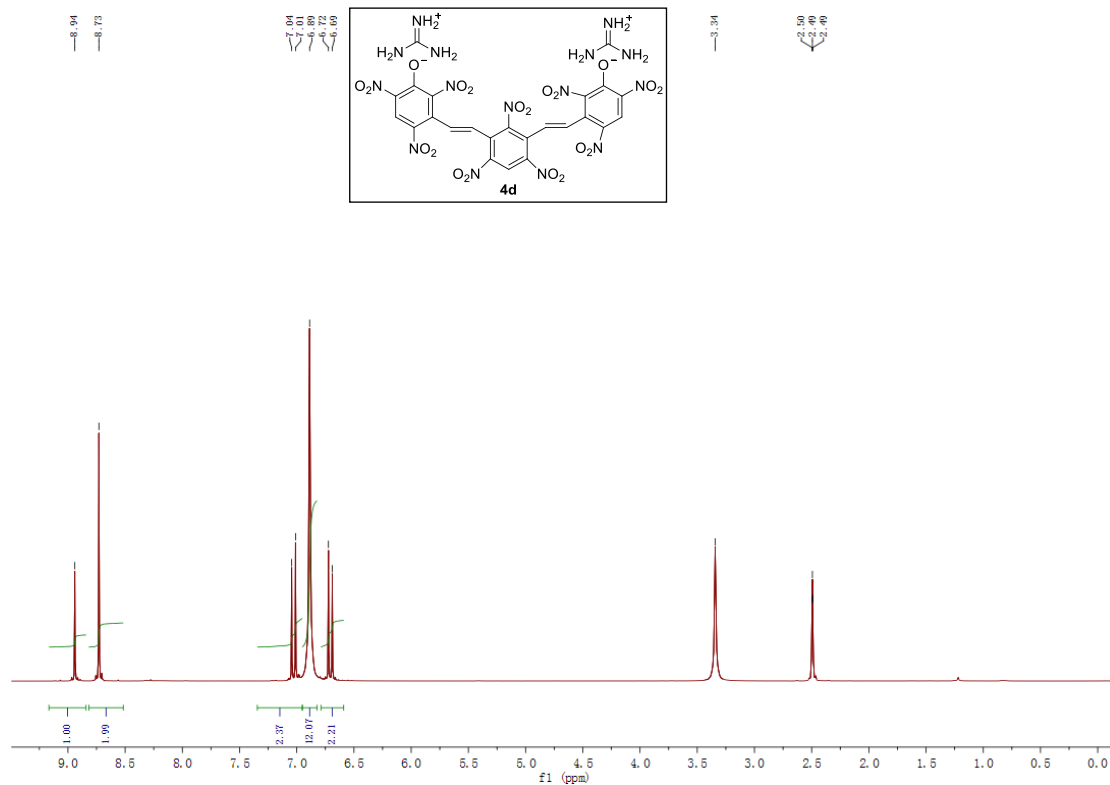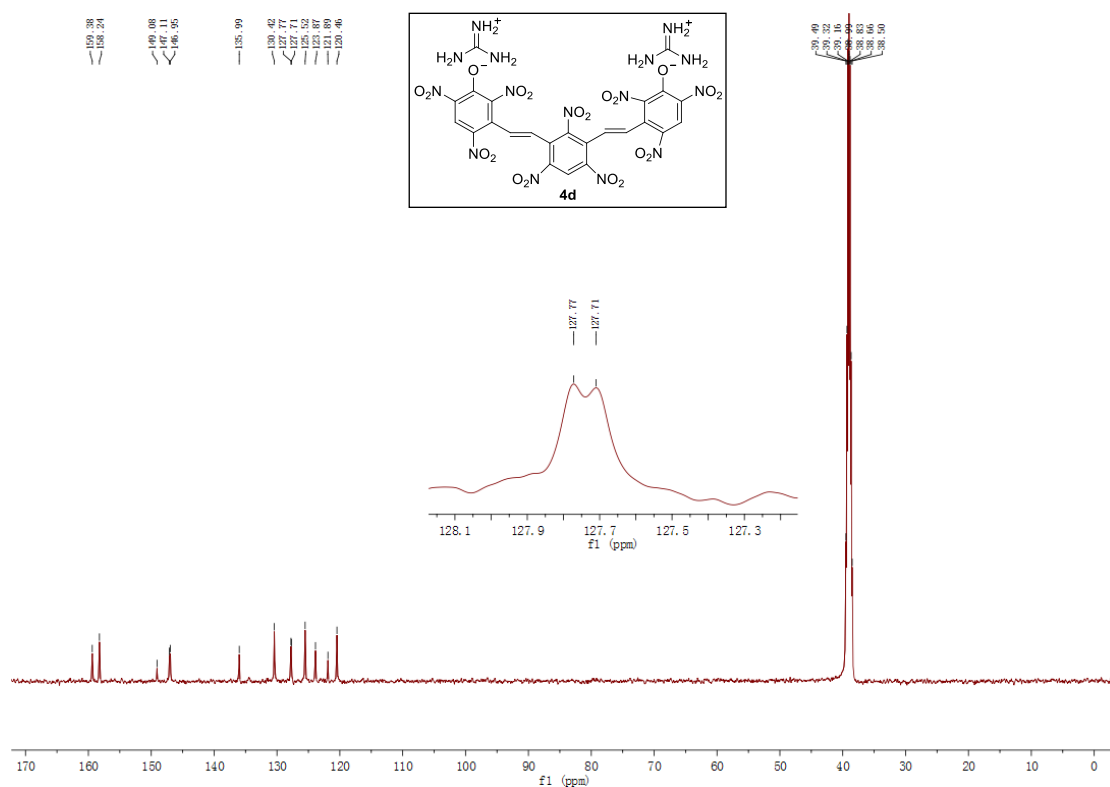

# Supporting Information

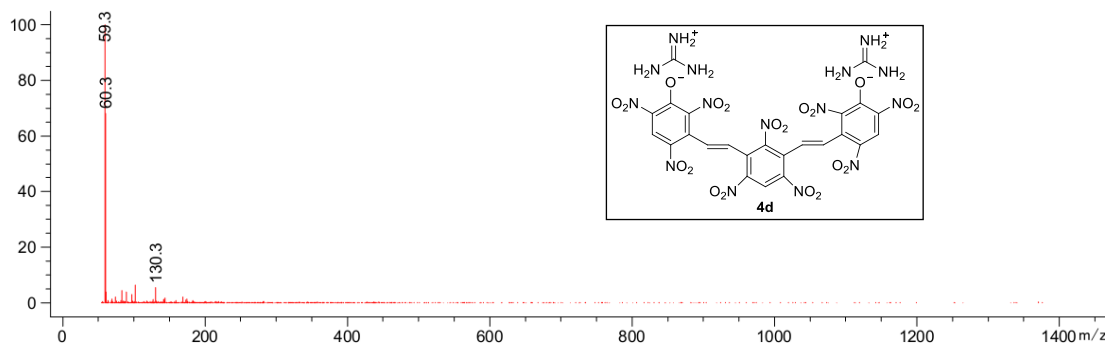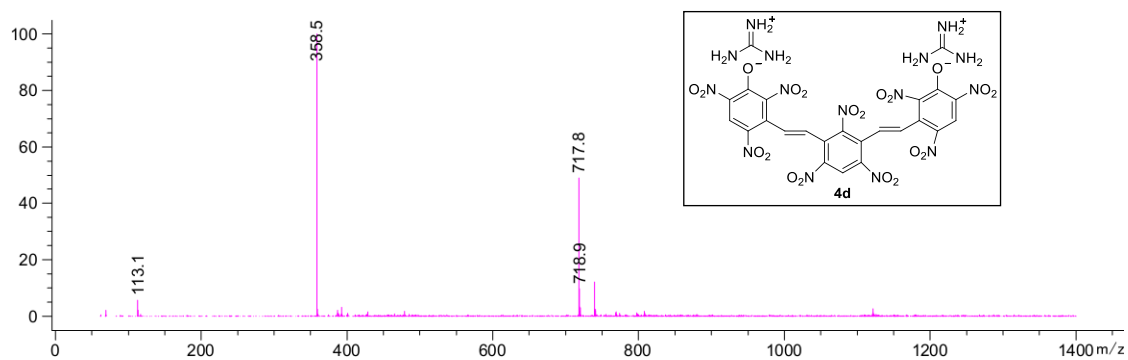



# Supporting Information

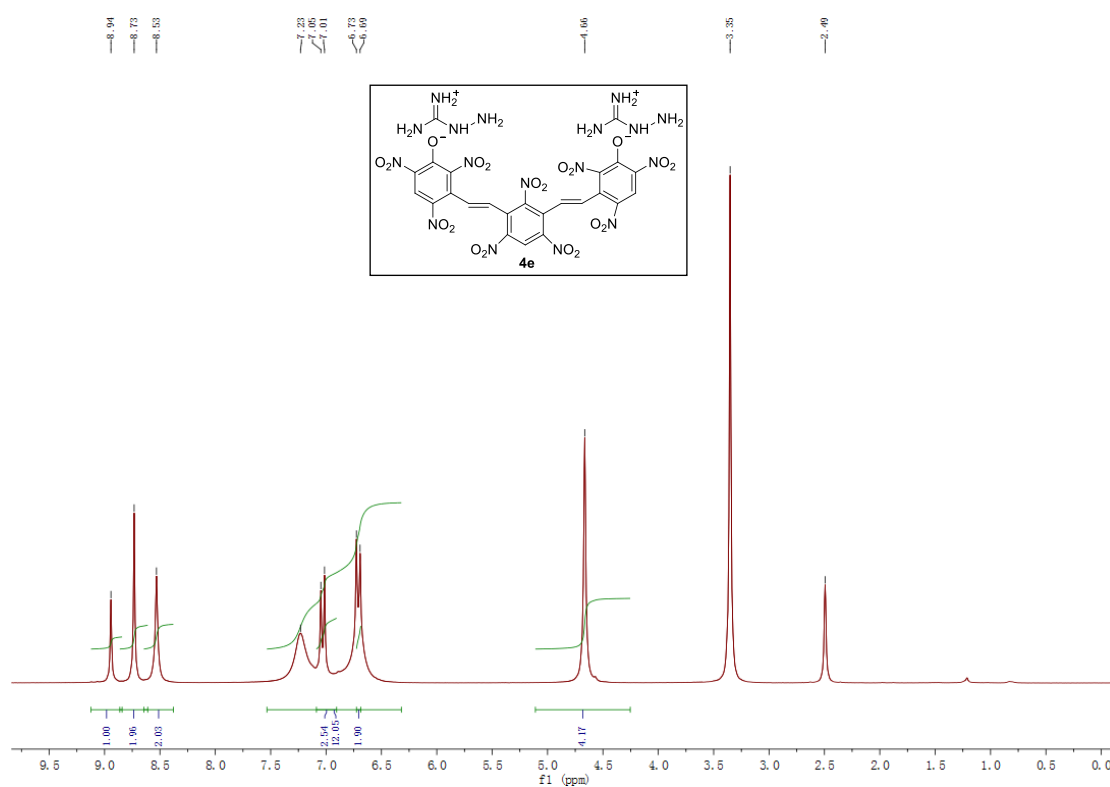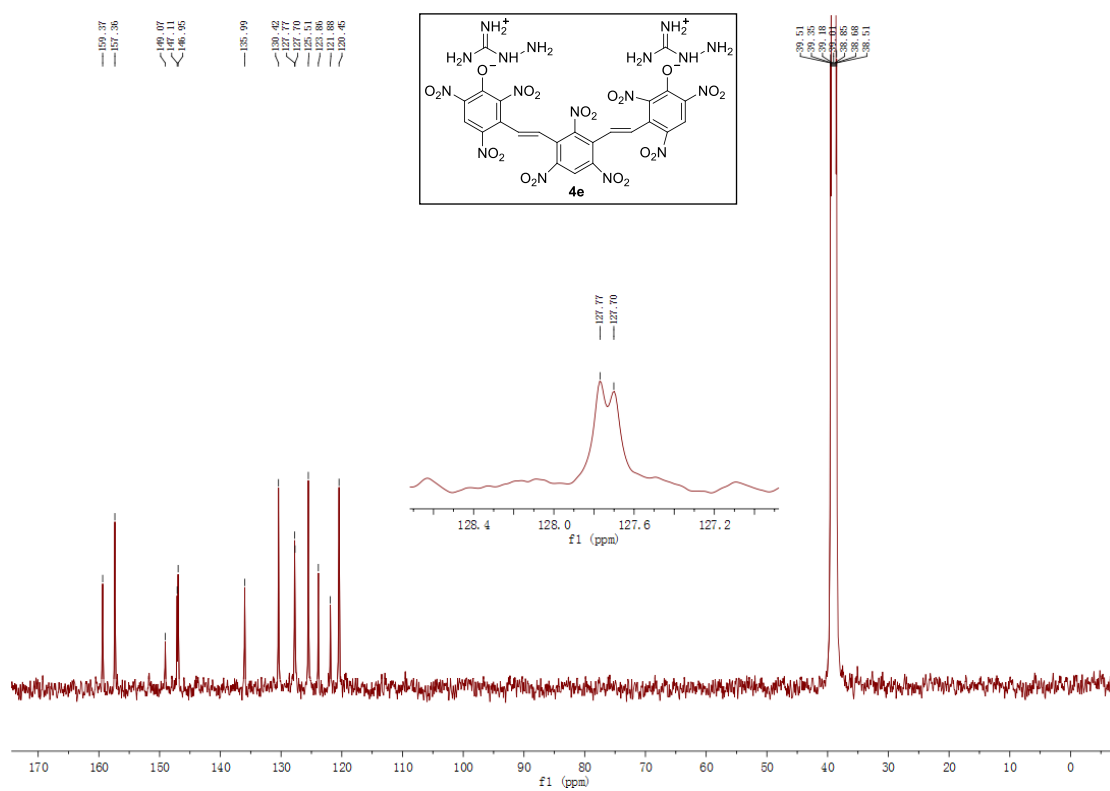

# Supporting Information

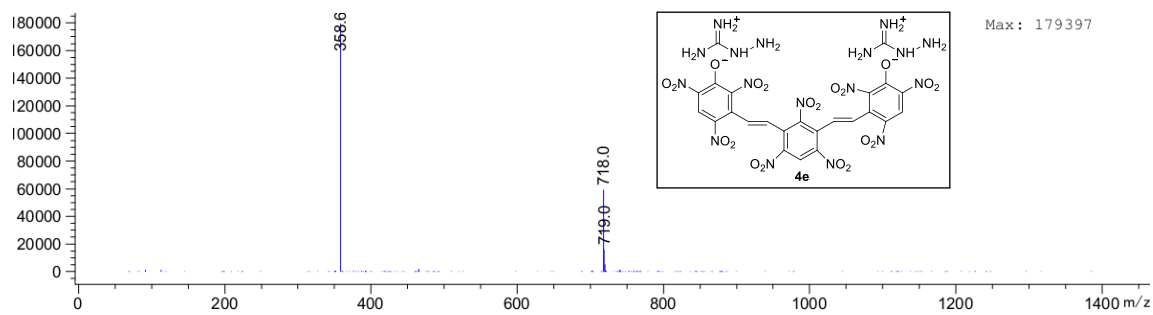

# Supporting Information

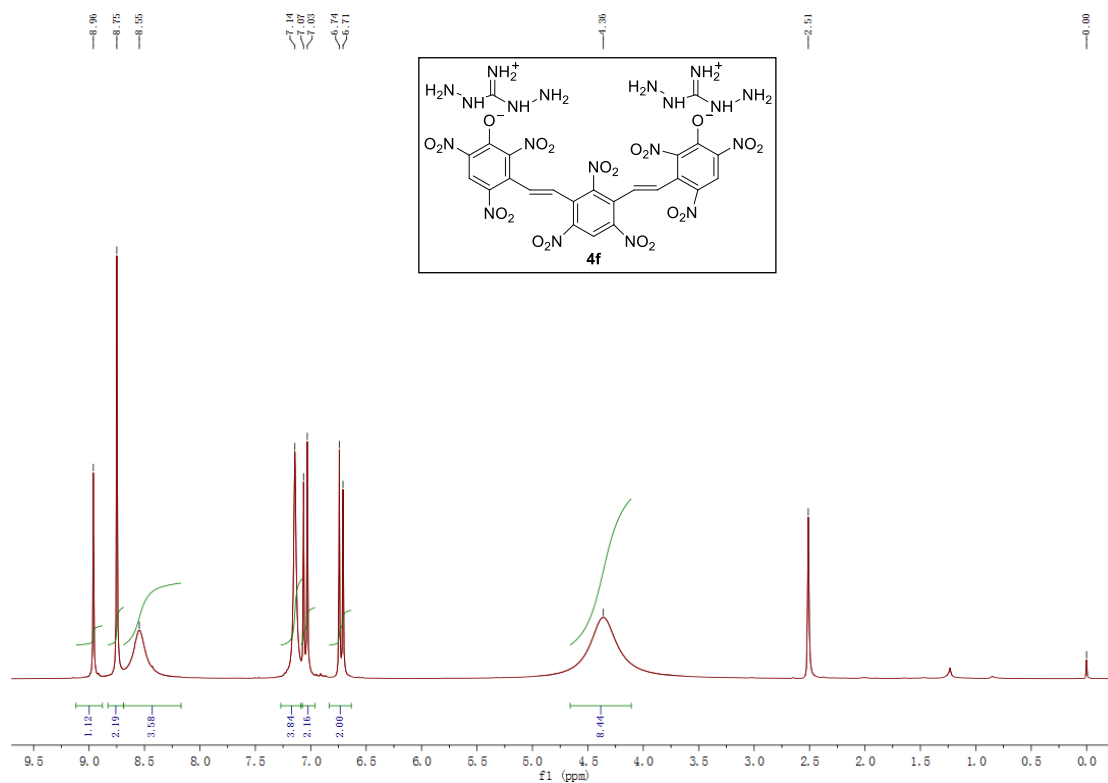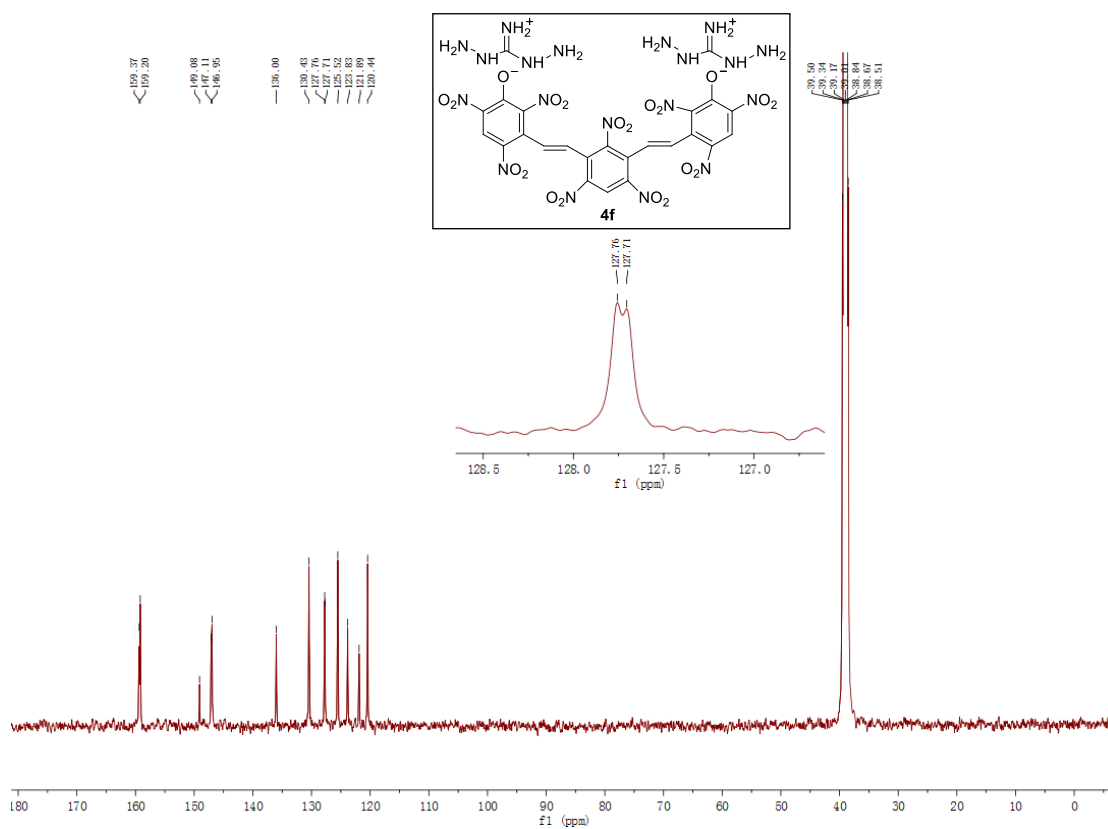



# Supporting Information

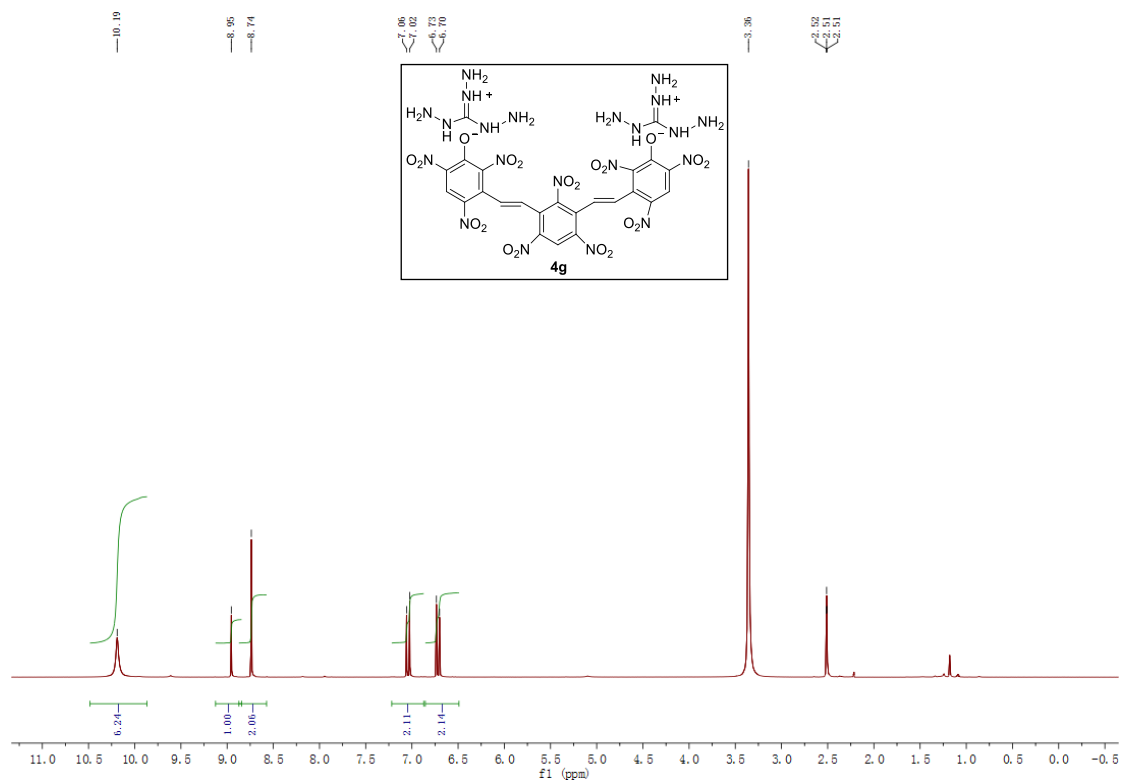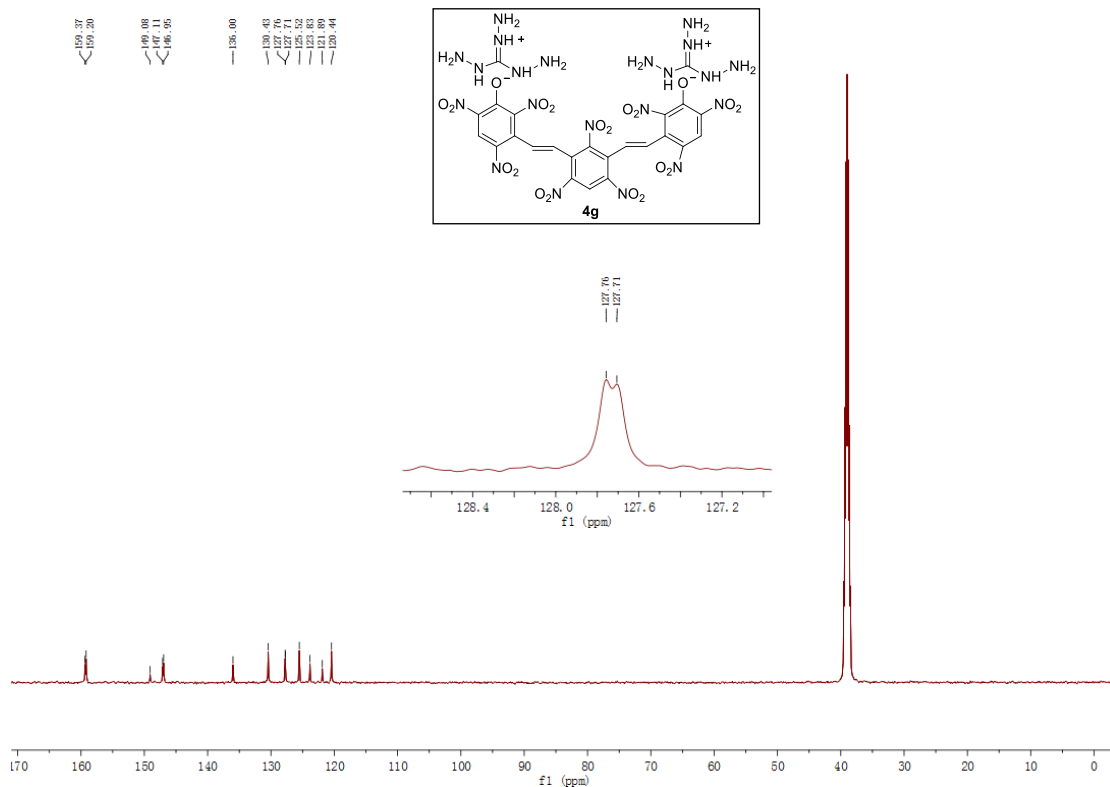

# Supporting Information

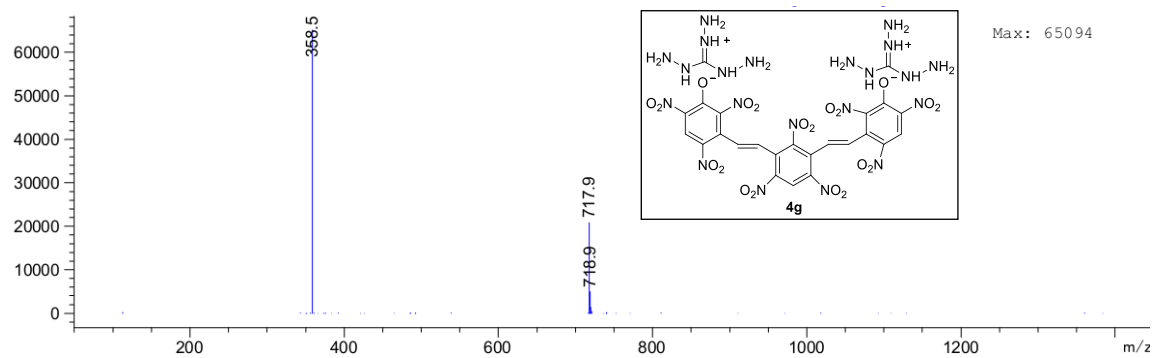

# Supporting Information

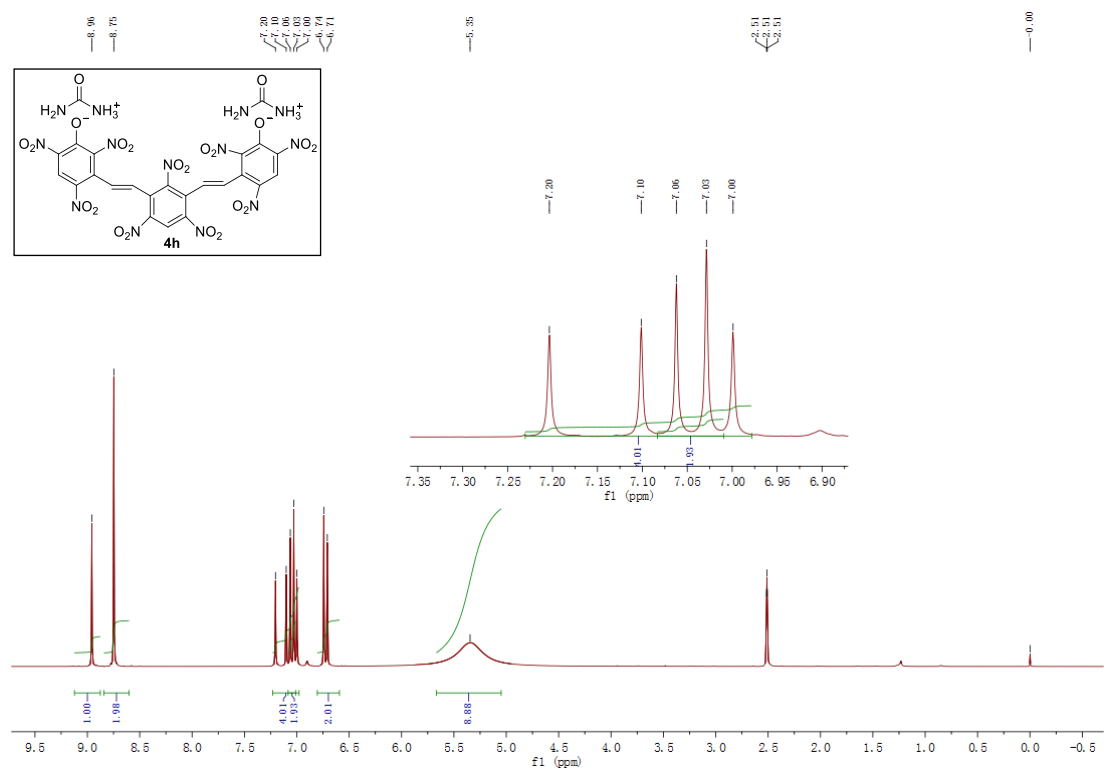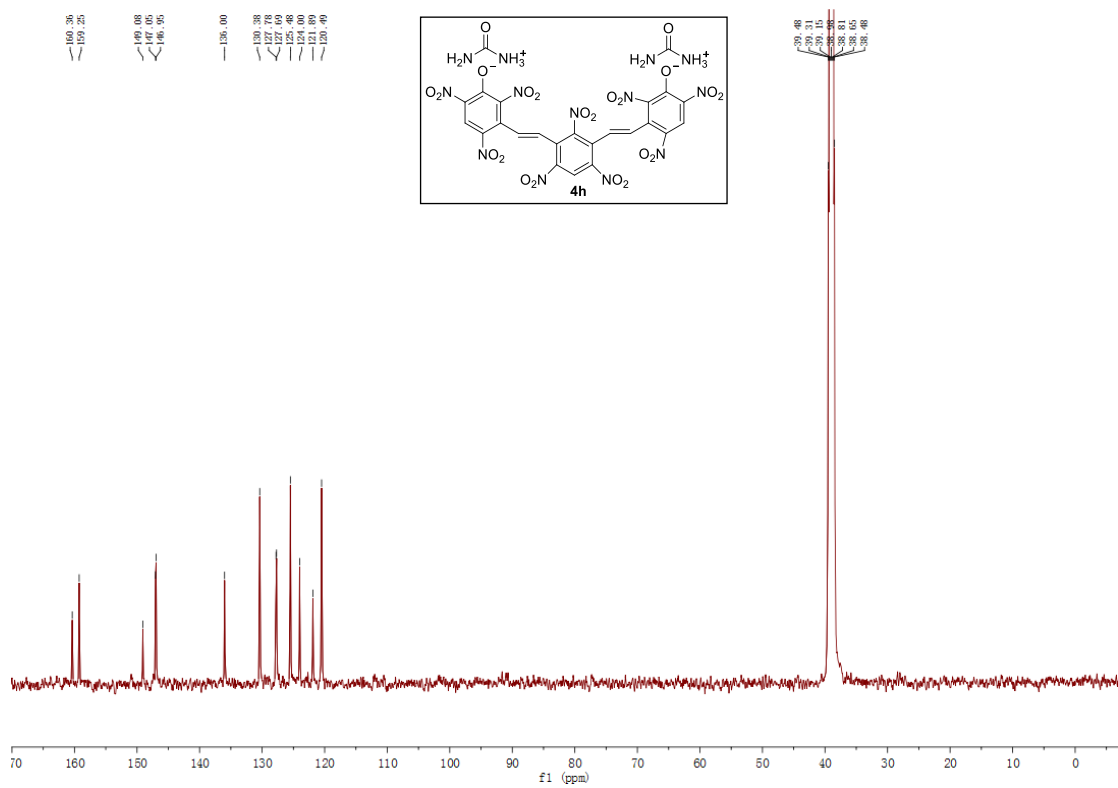

# Supporting Information

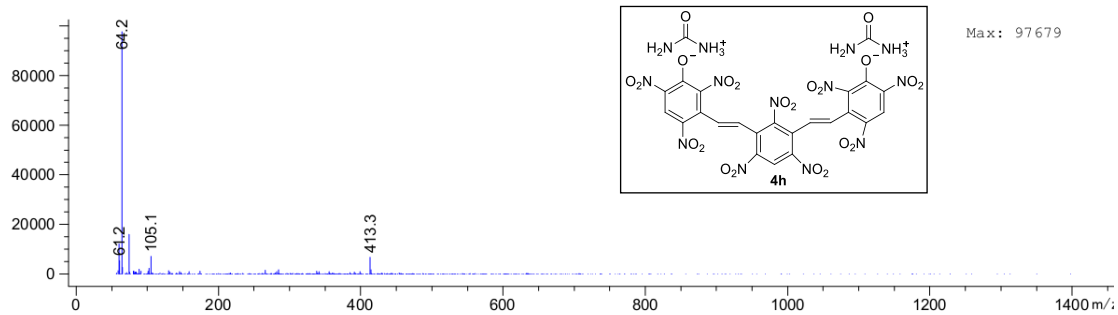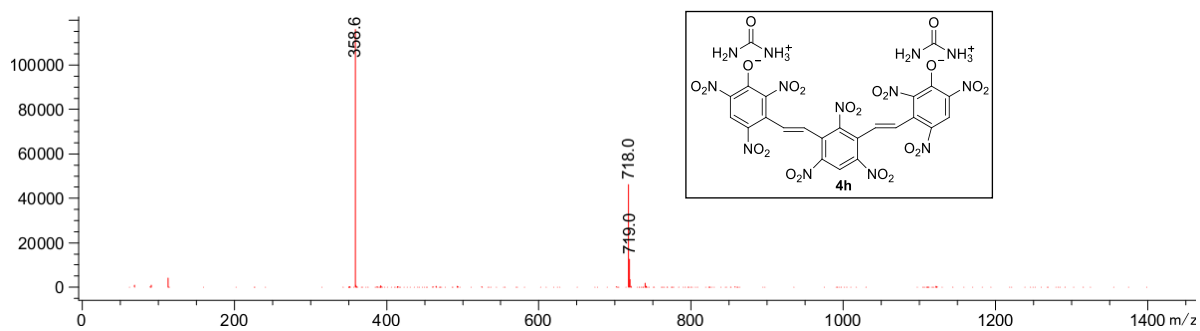



# Supporting Information

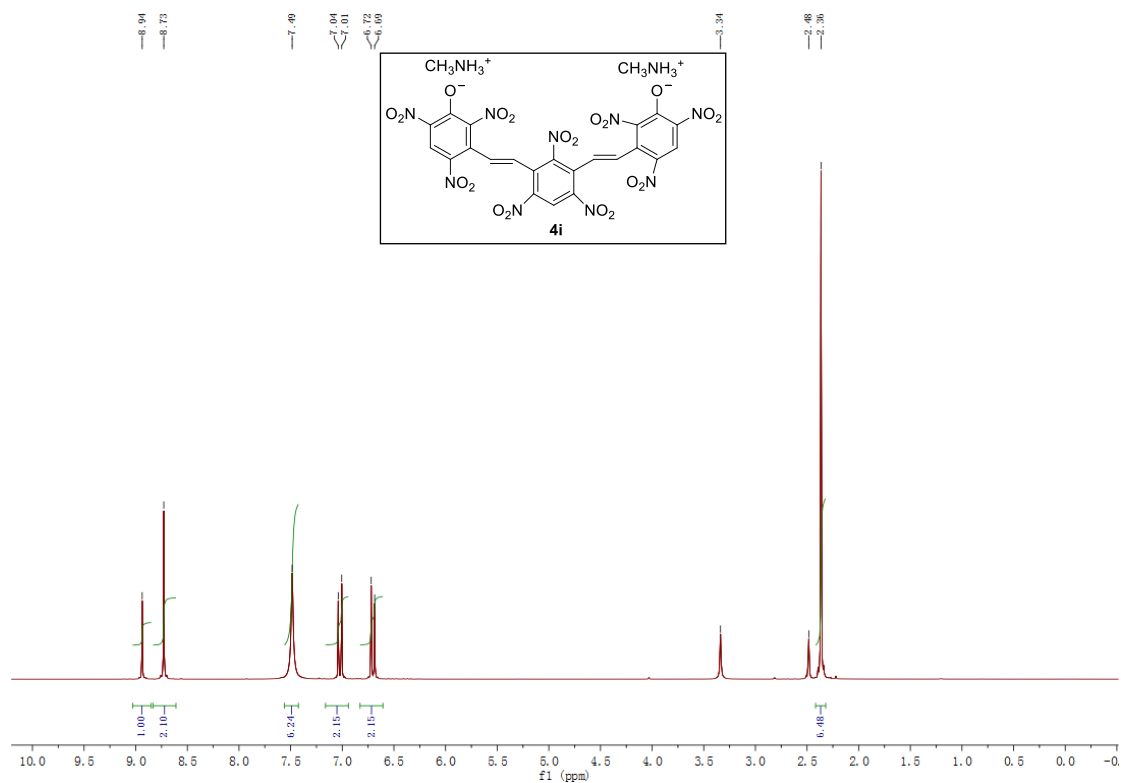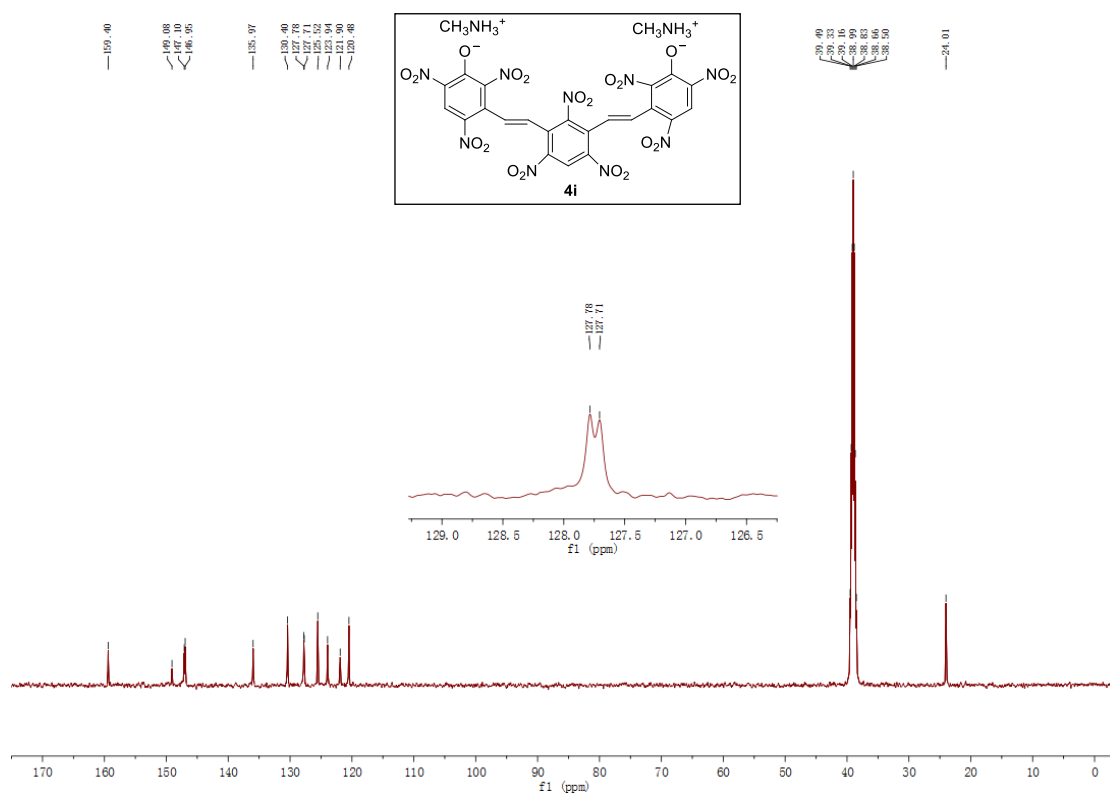

# Supporting Information

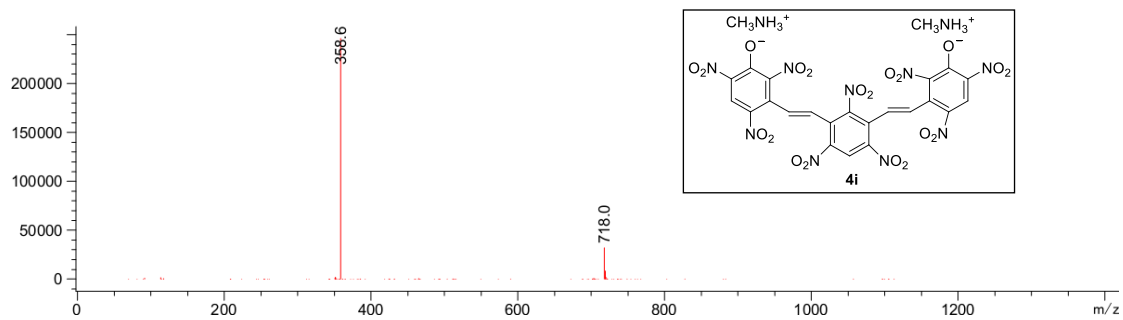

# Supporting Information

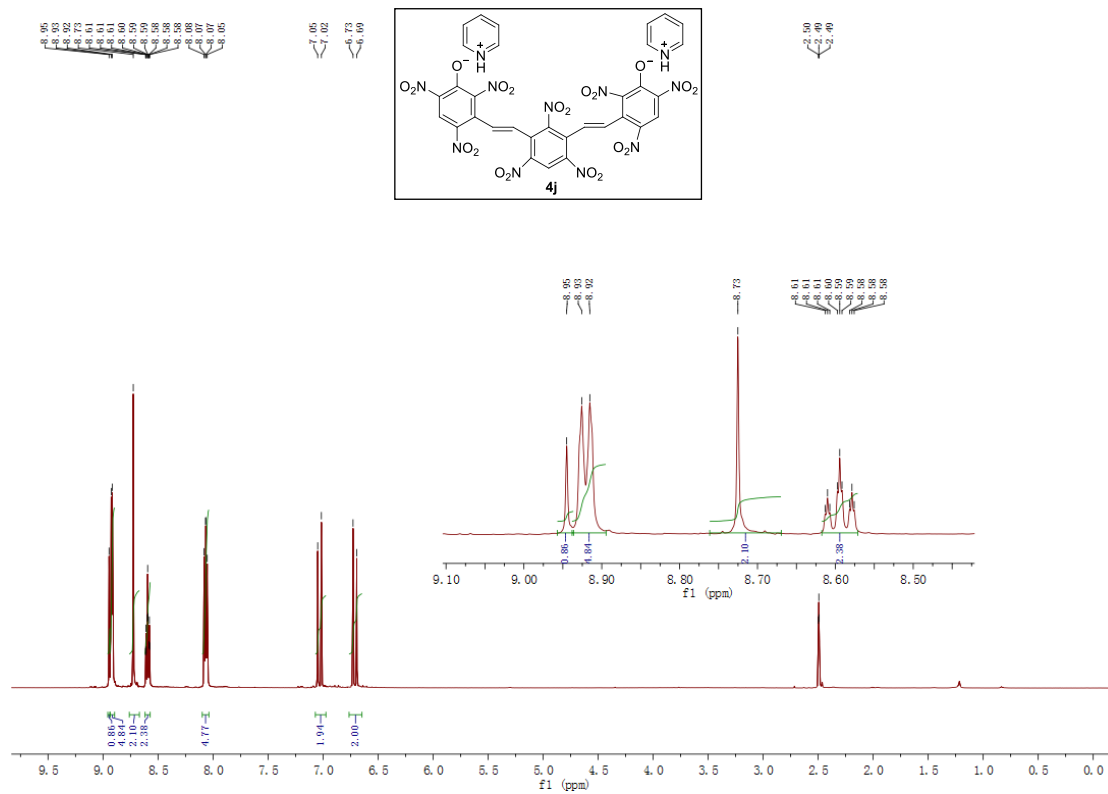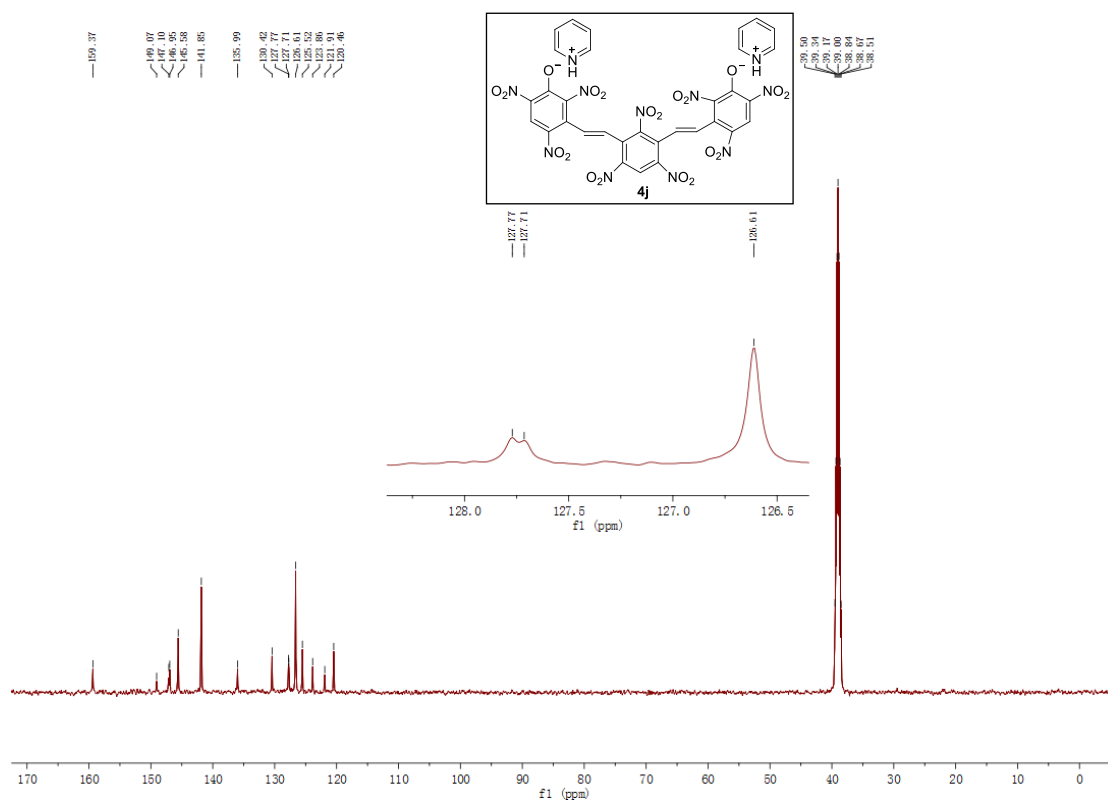

# Supporting Information

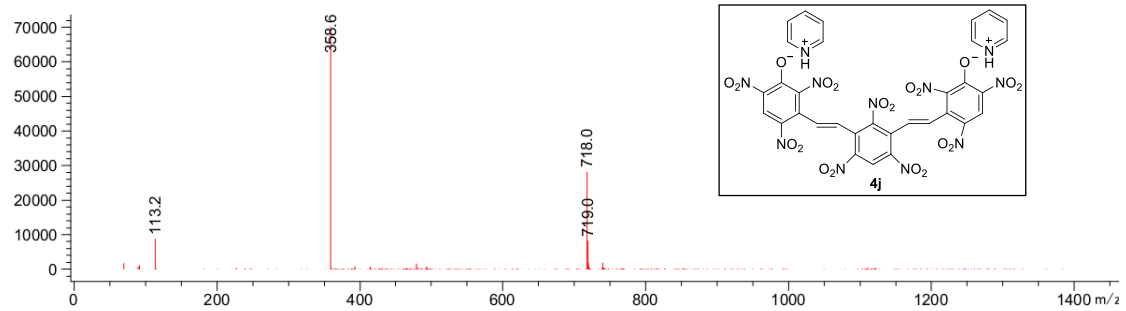

# Supporting Information

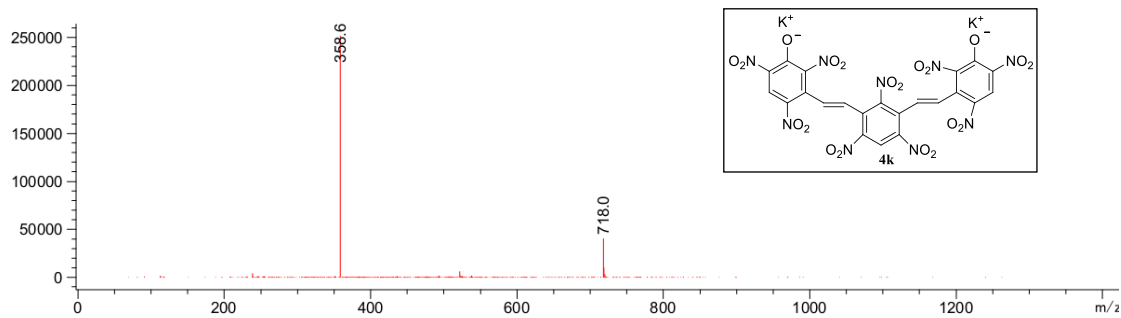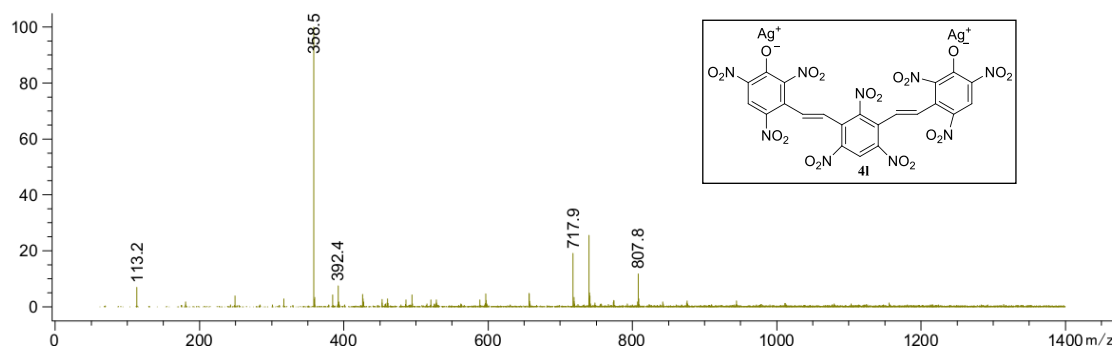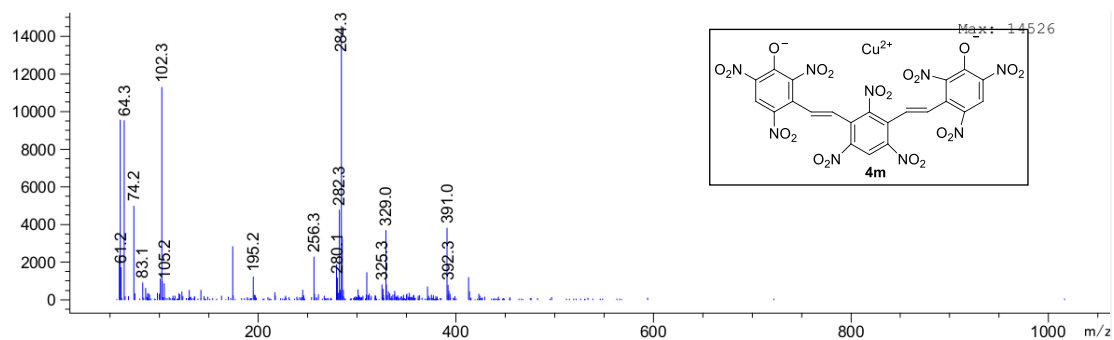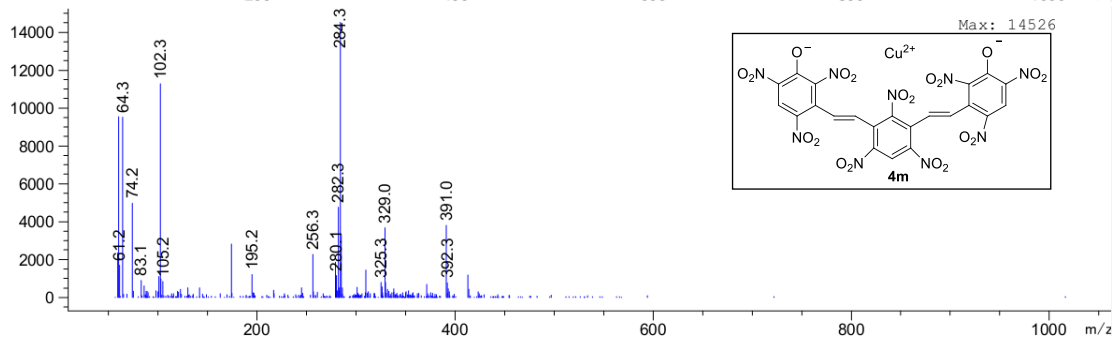

Supplement: c4nj01091d1.pdf [file c4nj01091d1.pdf]
